# Supplementary material for: Tissue-resident memory Th17 cells maintain stable fungal commensalism in the oral mucosa
Source: PubMed Central journal article supplement (PMC7946631; doi:10.1038/s41385-020-0327-1), 2020-07-27
Supplement: 41385_2020_327_MOESM1_ESM.pdf [file 41385_2020_327_MOESM1_ESM.pdf]

# Figure S1

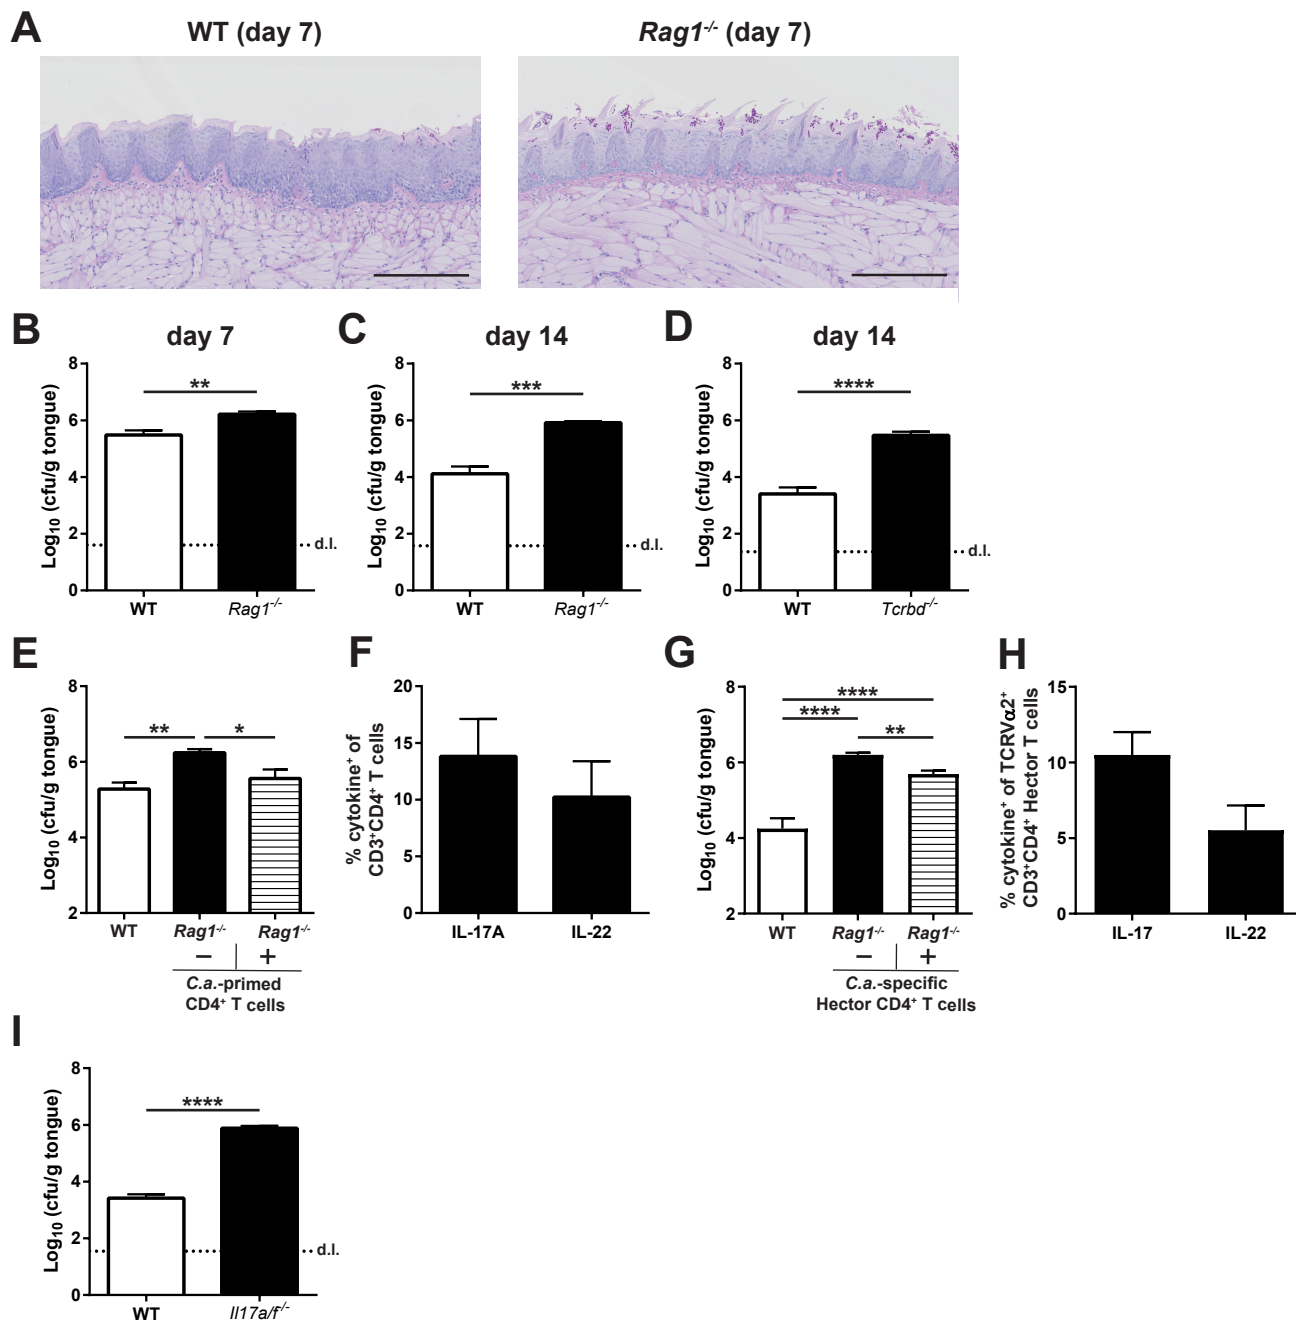

**Figure S1 (related to Figure 1): T cells are required for preventing fungal overgrowth during *C. albicans* colonization of the oral mucosa with strain 101.** WT and *Rag1*<sup>-/-</sup>, *Tcrbd*<sup>-/-</sup> or *Il17a/f*<sup>-/-</sup> mice were infected sublingually with *C. albicans* strain 101. (A) Representative images of sagittal tongue sections stained with PAS on day 7 post-infection. Scale bars: 250  $\mu$ m. (B-D) The fungal burden in the tongue was determined by plating tissue homogenates on YPD agar on day 7 (B) or day 14 (C, D) post-infection. Data are the mean + SEM of 6-9 individual mice per group pooled from 2 independent experiments per time point. (E-H) *Rag1*<sup>-/-</sup> mice received an adoptive transfer of *C. albicans*-primed polyclonal CD4<sup>+</sup> T cells (E) or naive *C. albicans*-specific TCR transgenic Hector CD4<sup>+</sup> T cells (G) one day prior to infection with *C. albicans* strain 101, as indicated. The fungal load was determined as in B-D on day 7 (E) and day 14 (G) post-infection. Cervical lymph node cells were re-stimulated with *C. albicans*-pulsed DC1940 cells for 5 hours in the presence of Brefeldin A and IL-17A and IL-22 production was analyzed by intracellular cytokine staining and flow cytometry (F, H). Data are the frequency of cytokine producing CD3<sup>+</sup>CD4<sup>+</sup> cells. Data are the mean + SEM of 6-14 (E, G) or 5-11 (F, H) individual mice per group pooled from 3-4 independent experiments. (I) The tongue fungal burden was determined as in B-D on day 28 post-infection. Data are the mean + SEM of 7-8 individual mice per group pooled from 2 independent experiments. The dotted line represents the detection limit (d.l.). Statistics were calculated using t-test (B-D, I) or one-way ANOVA (E, G),  $p^* < 0.05$ ,  $p^{**} < 0.01$ ,  $p^{***} < 0.001$ ,  $p^{****} < 0.0001$ .

# Figure S2

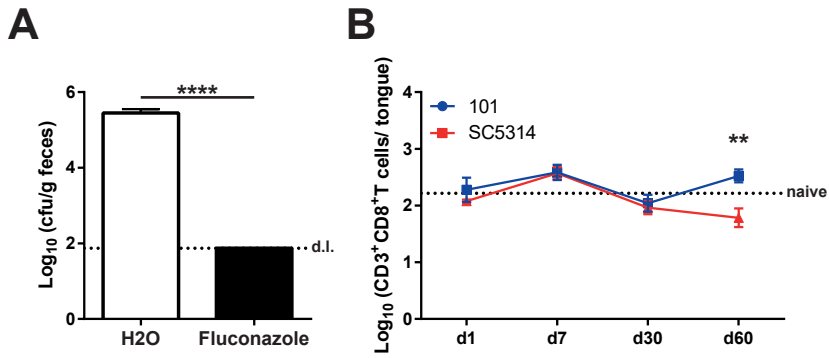

**Figure S2 (related to Figure 2). Stable colonization of mice with *C. albicans* results in a persistent population of Th17 cells but not CD8+ T cells in the tongue.** (A) WT mice were infected sublingually with *C. albicans* strain 101. On day 8 post-infection, mice were or were not treated with fluconazole for 14 days, as indicated. Clearance of *C. albicans* in the fluconazole-treated group was verified by plating fecal homogenates on YPD agar. d.l., detection limit. Data are the mean + SEM from 7- individual mice per group pooled from 2 independent experiments. (B) WT mice were infected sublingually with *C. albicans* strain 101 (blue) or strain SC5314 (red), respectively, for the indicated periods of time. CD3+CD8+ T cells in the tongue were quantified at the indicated time points post-infection using flow cytometry and the gating strategy shown in Figure 2A. Each symbol represents the mean + SEM of 6-13 individual mice per group pooled from 3 independent experiments. The dotted line represents the mean value determined in naïve mice. Statistics were calculated using t-test (A) or 2-way ANOVA (B),  $p^{**}<0.01$ ,  $p^{****}<0.0001$ .

# Figure S3

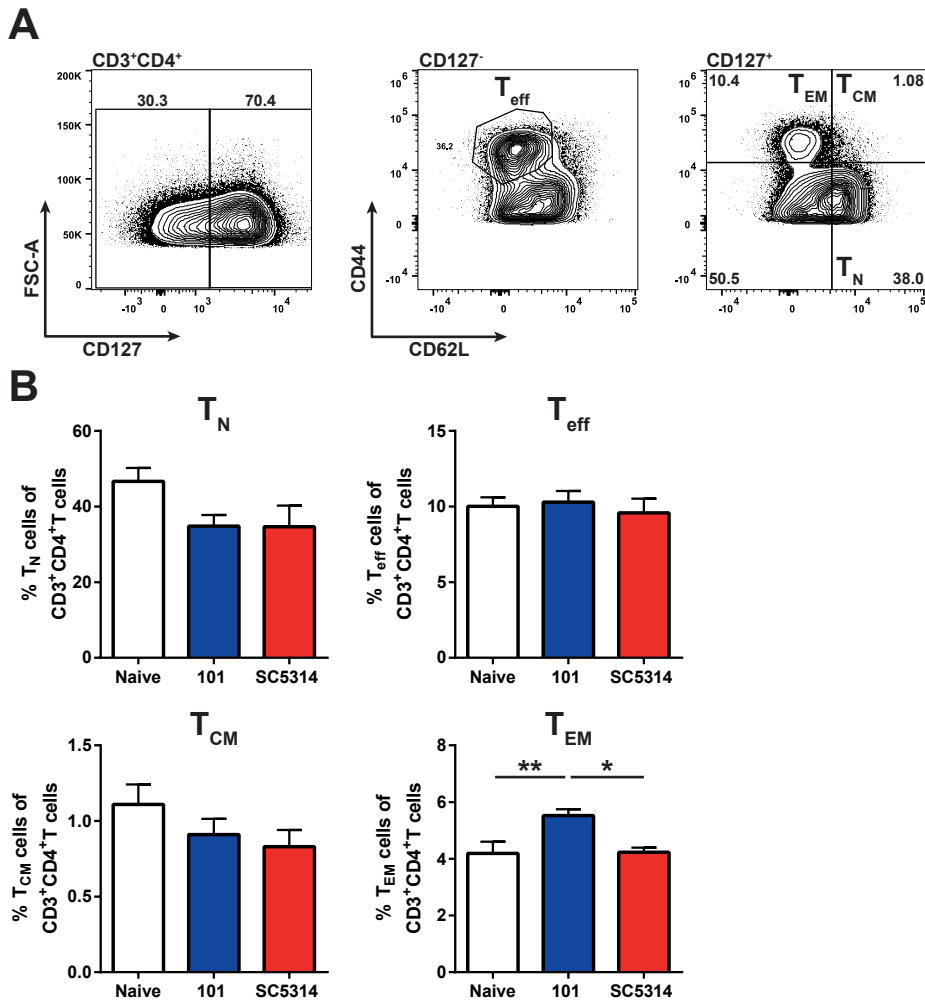

**Figure S3 (related to Figure 3). *C. albicans* colonization induces CD127+CD44+CD62L-CD4+ effector memory T cells in the cervical lymph nodes.** WT mice were infected sublingually with *C. albicans* strain 101 (blue) or SC5314 (red) and the cervical lymph nodes were analyzed for CD3+CD4+ T cell subsets. (A) Representative FACS plots showing the gating of CD127+CD44-CD62L+ naïve T cells ( $T_N$ ), CD127-CD44+CD62L- effector T cells ( $T_{eff}$ ), CD127+CD44+CD62L+ central memory T cells ( $T_{CM}$ ) and CD127+CD44+CD62L- effector memory T cells ( $T_{EM}$ ). (B) Quantification of naïve T,  $T_{eff}$ ,  $T_{CM}$  and  $T_{EM}$  cell frequencies among CD3+CD4+ T cells on day 60 post-infection. Data are the mean + SEM from 7-11 individual mice per group pooled from 2-3 independent experiments. Statistics were calculated using one-way ANOVA,  $p^* < 0.05$ ,  $p^{**} < 0.01$ .

# Figure S4

**A**

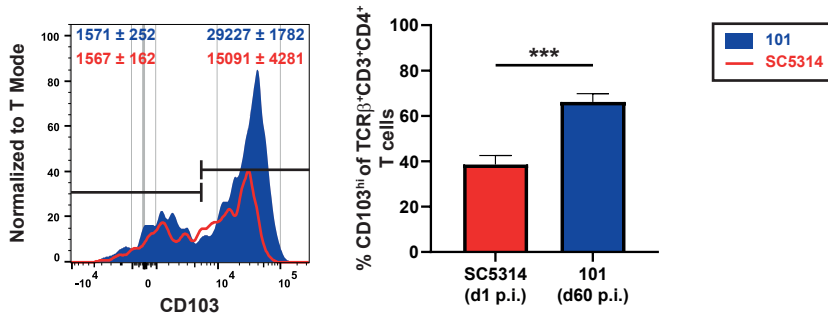

**B**

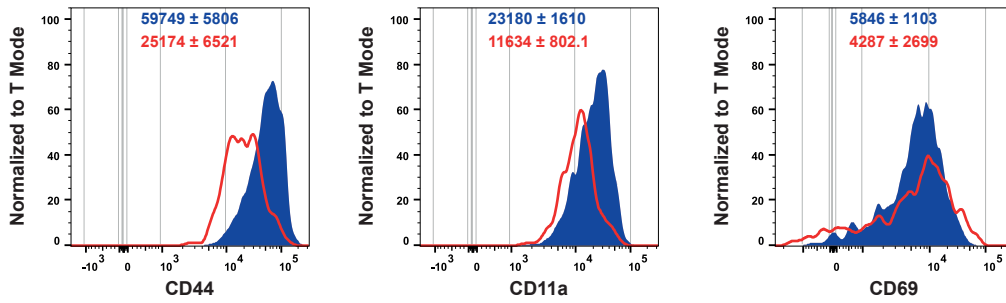

**C**

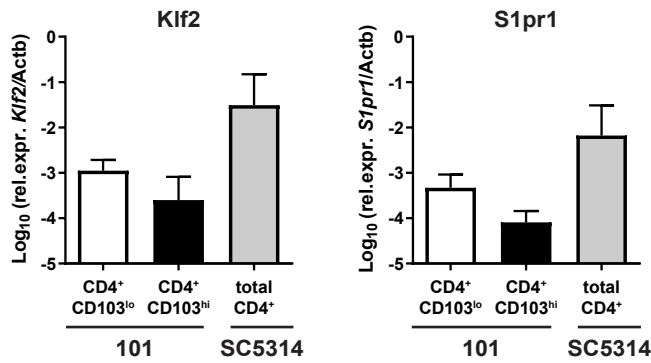

**Figure S4 (related to Figure 3). TRM cells in the tongue of stably colonized mice are distinct from TCRβ<sup>+</sup> T cells that respond to acute OPC.** WT mice were infected sublingually with *C. albicans* strain 101 for 60-90 days (blue) or strain SC5314 for 1 day (red). (A) The Median fluorescence intensity (MFI) of CD103 staining (left) and the frequency (right) of the CD103<sup>hi</sup> and CD103<sup>lo</sup> TCRβ<sup>+</sup>CD3<sup>+</sup>CD4<sup>+</sup> subsets in the tongue was determined. Numbers represent the mean + SD of 4-5 individual mice per group from one representative out of two independent experiments (left) and the mean + SEM from 3-5 individual mice per group pooled from 2 independent experiments (right). (B) MFI of CD44, CD11a and CD69 staining for the total TCRβ<sup>+</sup>CD3<sup>+</sup>CD4<sup>+</sup> population was determined in the tongues of infected mice. Numbers represent the mean + SD of 4-5 individual mice per group from one representative out of two independent experiments. (C) Klf2 and S1pr1 transcripts were quantified by RT-qPCR in TCRβ<sup>+</sup>CD3<sup>+</sup>CD4<sup>+</sup>CD103<sup>hi</sup> and TCRβ<sup>+</sup>CD3<sup>+</sup>CD4<sup>+</sup>CD103<sup>lo</sup> T cell subsets sorted from the tongue of strain 101-infected mice and in total TCRβ<sup>+</sup>CD3<sup>+</sup>CD4<sup>+</sup> cells sorted from the tongue of strain SC5314-infected animals. Data from strain 101-infected mice are the same as those shown in Fig 3I. Each bar represents the mean + SEM from 2-3 samples that were obtained by pooling the tongues of 4-5 mice each. Statistics were calculated using t-test (A) p\*\*\* < 0.001.

# Figure S5

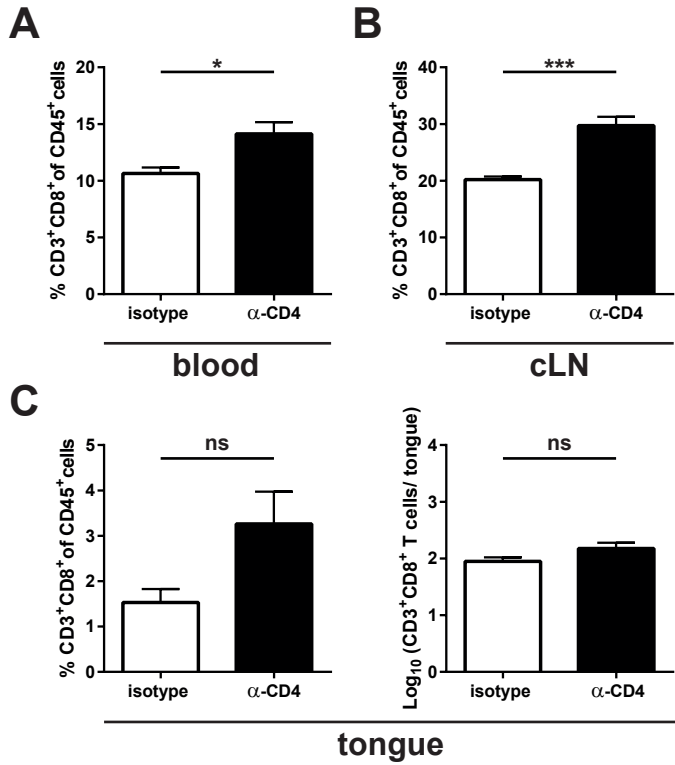

**Figure S5 (related to Figure 4). CD4<sup>+</sup> T cell depletion results in a relative increase in CD8<sup>+</sup> T cells in the tongue.** WT mice were infected sublingually with *C. albicans* strain 101. 21 days post-infection, mice were injected intraperitoneally with an anti-CD4 depleting antibody or an isotype control for two consecutive days. 7 days later, the frequency of CD3<sup>+</sup>CD8<sup>+</sup> T cells among CD45<sup>+</sup> cells was analyzed in blood (A), cervical lymph nodes (cLN, B) and tongue (C, left panel). In the tongue, absolute numbers of CD8<sup>+</sup> T cells were also assessed (C, right panel). Data are the mean + SEM of 7 mice per group pooled from two independent experiments. Statistics were calculated using t-test,  $p^* < 0.05$ ,  $p^{***} < 0.001$ .

# Figure S6

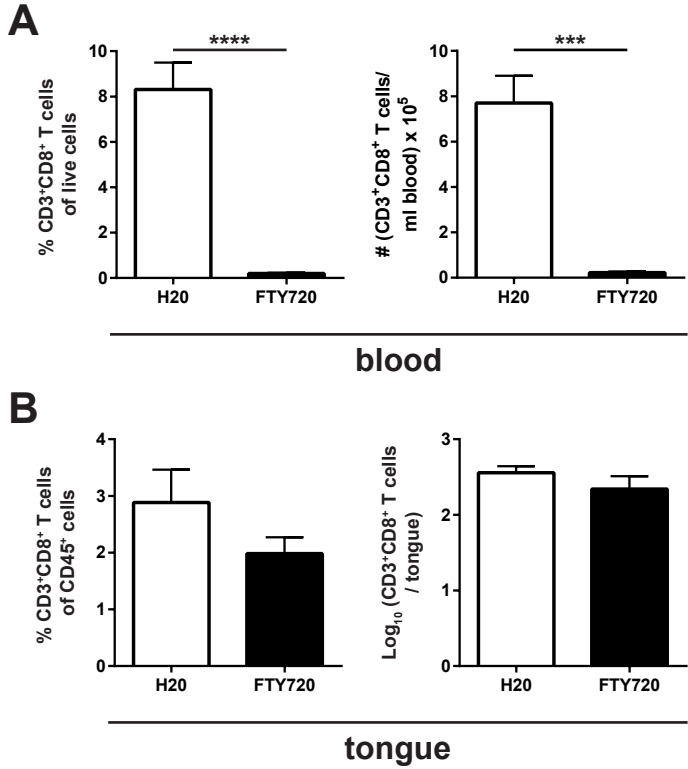

**Figure S6 (related to Figure 5). Tongue CD8+ T cells in the tongue of *C. albicans*-colonized mice are not affected by FTY720.** WT mice were infected sublingually with *C. albicans* strain 101. 21 days post-infection, FTY720 was administered in the drinking water for 3 weeks and CD3+CD8+ T cells in the blood and in the tongue were analyzed by flow cytometry. Frequencies (left) and absolute numbers (right) of CD3+CD8+ T cells in the blood (A) and in the tongue (B). Data are the mean + SEM of 10 mice per group pooled from two independent experiments. Statistics were calculated using t-test, p\*\*\*\*<0.0001.

# Figure S7

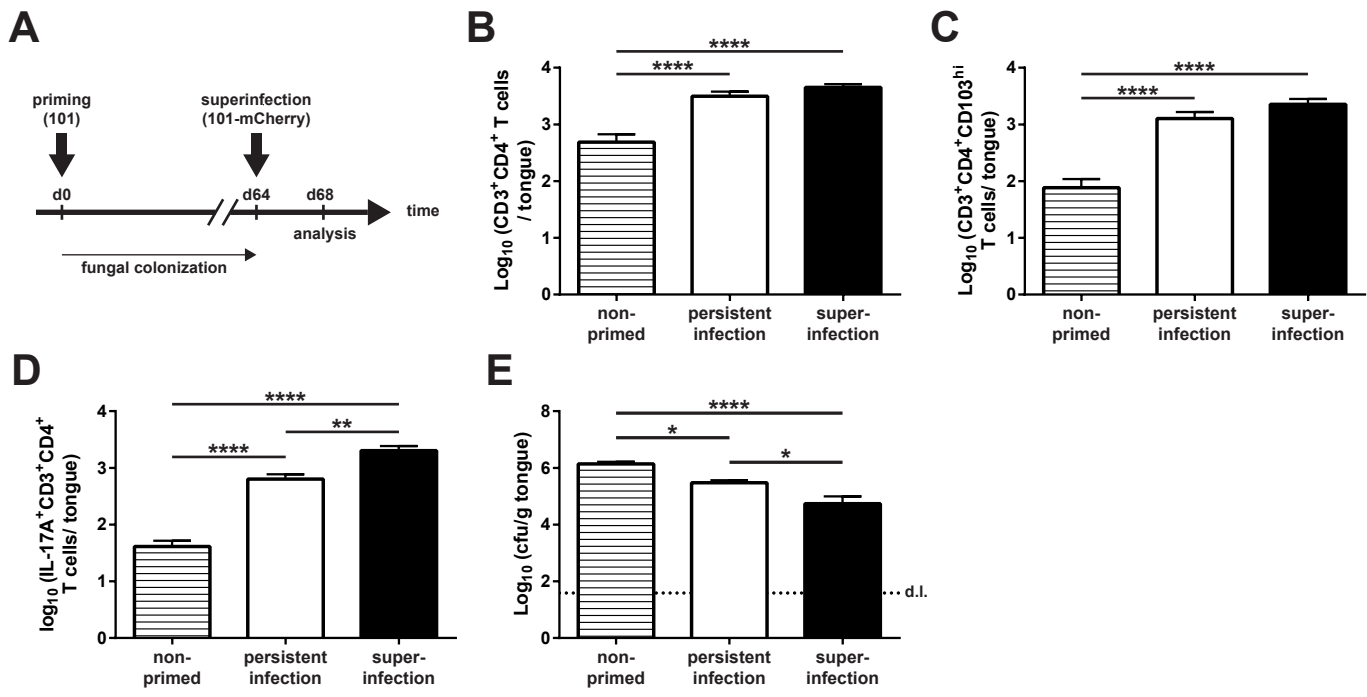

**Figure S7 (related to Figure 6). TRM cells compensate fluctuations in the *C. albicans* colonization load.** WT mice were infected sublingually with *C. albicans* strain 101 and super-infected with strain 101-mCherry on day 60 post-infection (superinfection) or not (persistent infection), as indicated. For the secondary infection, we used a mCherry-expressing variant of strain 101 to distinguish the fungus introduced during the primary and the secondary infection. As a control, a group of mice was included that did not receive a primary infection with strain 101 (non-primed). Tongue CD4<sup>+</sup> T cells and fungal burden were analyzed on day 4 after (super)infection with strain 101-mCherry. (A) Schematic outline of the experiment. (B-C) Quantification of overall CD3<sup>+</sup>CD4<sup>+</sup> T cells and CD103<sup>hi</sup>CD3<sup>+</sup>CD4<sup>+</sup> T cells in the tongue. (D) Quantification of IL-17 production by CD3<sup>+</sup>CD4<sup>+</sup> tongue T cells that were re-stimulated with PMA and ionomycin for 4 hours in the presence of Brefeldin A. (E) Tongue cfu. The dotted line represents the detection limit (d.l.). Each bar represents the mean + SEM of 7-13 mice per group pooled from 2-3 independent experiments. Statistics were calculated using one-way ANOVA, p\* < 0.05, p\*\* < 0.01, p\*\*\*\* < 0.0001.

# Figure S8

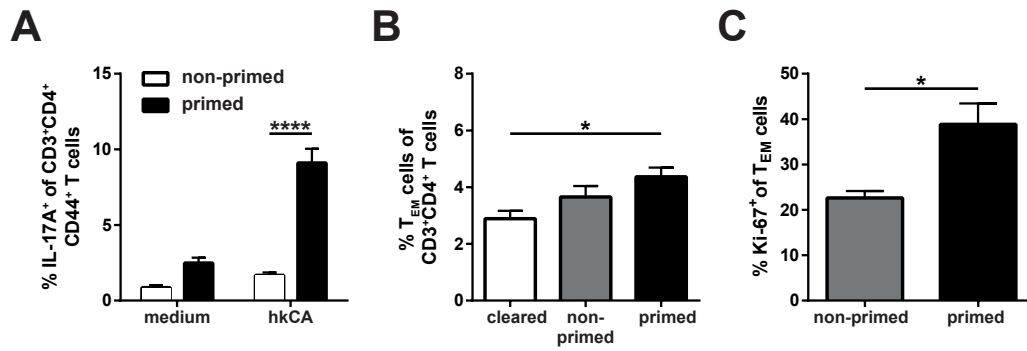

**Figure S8 (related to Figure 7). TEM cells expand in the cervical lymph node after cleared infection and secondary fungal exposure.** WT mice were infected sublingually with *C. albicans* strain 101 and treated with fluconazole for 2 weeks starting from day 8 post-infection onwards. Mice were re-infected on day 60 after the primary infection with strain 101-mCherry (primed). As a control, a group of naïve mice was included that did not receive a primary infection with strain 101 (non-primed). (A) To check for the efficiency of T cell memory induction 4 days after re-infection, cervical lymph node T cells were re-stimulated with *C. albicans*-pulsed DC1940 cells for 5 hours in the presence of Brefeldin A. IL-17A production was analyzed by intracellular cytokine staining and flow cytometry. Plots show the frequency of IL-17A-producing CD3<sup>+</sup>CD4<sup>+</sup> T cells. Each bar represents the mean + SEM of 8 mice per group pooled from two independent experiments. (B, C) Plots depict the frequency of CD127<sup>+</sup>CD44<sup>+</sup>CD62L<sup>-</sup> TEM cells among CD3<sup>+</sup>CD4<sup>+</sup> T cells (B), and the frequency of Ki-67<sup>+</sup> TEM cells (C) in the cervical lymph nodes. Each bar represents the mean + SEM of 6-12 mice per group pooled from 2-3 independent experiments. Statistics were calculated using t-test (C), one-way ANOVA (B), or two-way ANOVA (A), p\* < 0.05, p<\*\*\* 0.001.



## Supplementary Table

| REAGENT or RESOURCE                                           | SOURCE            | IDENTIFIER                                                           |
|---------------------------------------------------------------|-------------------|----------------------------------------------------------------------|
| <b>Antibodies (clones)</b>                                    |                   |                                                                      |
| FITC anti-mTCRVα2 (B20.1)                                     | Biologend         | Cat#127806, RRID: AB_1134188                                         |
| FITC anti-mCD44 (IM7)                                         | Biologend         | Cat#103022, RRID: AB_493685                                          |
| FITC anti-mCD4 (RMA4.4)                                       | Biologend         | Cat#116003, RRID: AB_313688                                          |
| FITC anti-mCD11a (M17/4)                                      | Biologend         | Cat#101106, RRID: AB_312779                                          |
| FITC anti-mCD4 (RMA4.5)                                       | Biologend         | Cat#100510, RRID: AB_312713                                          |
| PE anti-mCD45.2 (104)                                         | Biologend         | Cat#109808, RRID: AB_313445                                          |
| PE anti-mIL-22 (Poly5164)                                     | Biologend         | Cat#516404, RRID: AB_2124255                                         |
| PE anti-mCD90.1 (H1S51)                                       | eBioscience       | Cat#12-0900-83, RRID: AB_465774                                      |
| PE/Dazzle 594 anti-mCD103 (2E7)                               | Biologend         | Cat#121429, RRID: AB_2566492                                         |
| PE/Cy5 anti-mCD3e (145-2C11)                                  | Biologend         | Cat#100310, RRID: AB_312675                                          |
| Pe/Cy7 anti-mIL-17A (TC11-18H10.1)                            | Biologend         | Cat#506921, RRID: AB_2125011                                         |
| Pe/Cy7 anti-mCD69 (H1.2F3)                                    | Biologend         | Cat#104512, RRID: AB_493564                                          |
| PB anti-mCD4 (RM4-5)                                          | Biologend         | Cat#100531, RRID: AB_493374                                          |
| PB anti-mCD49a (Ha31/8)                                       | BD Biosciences    | Cat#740046, RRID: AB_2739815                                         |
| BV421 anti-mIFN-γ (XMG1.2)                                    | Biologend         | Cat#505830, RRID: AB_2563105                                         |
| BV421 anti-mCD127 (A7R34)                                     | Biologend         | Cat#135023, RRID: AB_10897948                                        |
| BV570 anti-mCD90.2 (30-H12)                                   | Biologend         | Cat#105329, RRID: AB_10917055                                        |
| BV70 anti-mCD44 (IM7)                                         | Biologend         | Cat#103037, RRID: AB_10900641                                        |
| BV570 anti-mCD8α (53-6.7)                                     | Biologend         | Cat#100739, RRID: AB_10897645                                        |
| BV605 anti-mCD90.1 (OX7)                                      | Biologend         | Cat#202537, RRID: AB_2562644                                         |
| BV605 anti-mCD4 (RM4.4)                                       | Biologend         | Cat#116027, RRID: AB_2800581                                         |
| BV605 anti-mCD4 (RM4.5)                                       | Biologend         | Cat#100548, RRID: AB_2563054                                         |
| BV605 anti-mCD62L (MEL-14)                                    | Biologend         | Cat#104438, RRID: AB_2563058                                         |
| APC anti-mCD62L (MEL-14)                                      | Biologend         | Cat#104412, RRID: AB_313099                                          |
| APC anti-mTCRVα2 (B20.1)                                      | Biologend         | Cat#127809, RRID: AB_1089251                                         |
| APC anti-mCD45.2 (104)                                        | Biologend         | Cat#109814, RRID: AB_389211                                          |
| APC anti-mIFN-γ (XMG1.2)                                      | Biologend         | Cat#505810, RRID: AB_315404                                          |
| Alexa700 anti-mKi-67 (16A8)                                   | Biologend         | Cat#652419, RRID: AB_2564284                                         |
| Alexa700 anti-mCD90.1 (Ox-7)                                  | Biologend         | Cat#202528, RRID: AB_1626241                                         |
| Alexa700 anti-mCD45.2 (104)                                   | Biologend         | Cat#109822, RRID: AB_493731                                          |
| <b>Fungal Strains</b>                                         |                   |                                                                      |
| <i>C. albicans</i>                                            | 81                | SC5314                                                               |
| <i>C. albicans</i>                                            | 45                | 101                                                                  |
| <i>C. albicans</i>                                            | this report       | mCherry-101                                                          |
| <b>Biological Samples</b>                                     |                   |                                                                      |
| Fetal Calve Serum                                             | Bioconcept        | Cat# 2-01F10-I                                                       |
| <b>Chemicals, Peptides, and Recombinant Proteins</b>          |                   |                                                                      |
| Phosphate Buffered Salt Solutions (PBS, 1x)                   | Amimed/Bioconcept | Cat# 3-05F39                                                         |
| RPMI 1640                                                     | Life Technologies | Cat# 21875034                                                        |
| 2-Mercaptoethanol                                             | Life Technologies | Cat# 31350-010                                                       |
| EDTA (0.5M, pH 8)                                             | Life Technologies | Cat# AM9260G                                                         |
| Brefeldin A                                                   | Sigma-Aldrich     | Cat# B6542-25MG                                                      |
| DNAse I                                                       | Sigma-Aldrich     | Cat# DN25-100MG                                                      |
| Collagenase I                                                 | Life Technologies | Cat# 17100017                                                        |
| LIVE/DEAD Near IR Dead cell Stain Kit                         | Thermo Fisher     | Cat# L10119                                                          |
| BD Cytofix/Cytoperm Reagent                                   | BD Bioscience     | Cat# 554714                                                          |
| eBioscience™ Foxp3 / Transcription Factor Staining Buffer Set | Thermo Fisher     | Cat# 00-5523-00                                                      |
| BD Calibrite Beads                                            | BD Bioscience     | Cat# 349502                                                          |
| Paraformaldehyde                                              | Sigma-Aldrich     | Cat# P6148-500G                                                      |
| L-Glutamine                                                   | Thermo Fisher     | Cat# X0550-100                                                       |
| Penicillin/Streptomycin                                       | Amimed/Bioconcept | Cat# 4-01F00-H                                                       |
| Phorbol 12-myristate 13-acetate (PMA)                         | Sigma-Aldrich     | Cat# P8139                                                           |
| Ionomycin                                                     | Sigma-Aldrich     | Cat# I0634-1MG                                                       |
| Nonidet P40                                                   | Axonlab           | Cat# A1694,0250                                                      |
| Ketasol                                                       | Graeb AG          | Lot# 6680416                                                         |
| Rompun (2%)                                                   | Bayer             | Lot# KPOBFHR                                                         |
| Fluconazole                                                   | Sigma-Aldrich     | Cat# PHR1160-1G                                                      |
| Fingolimod (FTY720)                                           | Selleckchem       | Cat# S5002                                                           |
| FastStart Universal SYBR Green Master (Rox)                   | Roche             | Cat# 4913914001                                                      |
| <b>Primer</b>                                                 |                   |                                                                      |
| <i>Actb</i>                                                   | 34                | fwd 5'-CCCTGAAGTACCCATTGAAC-3'<br>rev 5'-CTTTTCACGGTTGGCCTTAG-3'     |
| <i>Itgae</i> (CD103)                                          | 88                | fwd 5'-CCTGTGCAGCATGTAAAGAATG-3'<br>rev 5'-CCAGGATCGGCAGTTCAGATAC-3' |
| <i>Klf2</i>                                                   | 57                | fwd 5'-ACCAACTGCGGCAAGACCTA-3'<br>rev 5'-CATCCTCCAGTTGCAATGA-3'      |
| <i>S1pr1</i>                                                  | 57                | fwd 5'-GTGTAGACCCAGAGTCCTGGC-3'<br>rev 5'-AGCTTTTCCTGGCTGGAGAG-3'    |

| Cell Lines                                                                             |                                                                                                    |                              |
|----------------------------------------------------------------------------------------|----------------------------------------------------------------------------------------------------|------------------------------|
| DC <sup>1940</sup> cells                                                               | Hans Acha-Orbea, University of Lausanne <sup>85</sup>                                              | N/A                          |
| Mouse strains                                                                          |                                                                                                    |                              |
| WT: C57BL/6JRj                                                                         | Janvier Elevage                                                                                    | C57BL/6JRj                   |
| <i>Rag1</i> <sup>-/-</sup> : B6.129S7-Rag1 <sup>tm1Mom</sup> /J                        | Swiss Immunological Mouse Repository (SwImMR) hosted by the University of Zurich, <sup>76</sup>    | MGI:88666                    |
| <i>TCRbd</i> <sup>-/-</sup> : B6.129P2-TCRb <sup>tm1Mom</sup> x TCRd <sup>tm1Mom</sup> | Swiss Immunological Mouse Repository (SwImMR) hosted by the University of Zurich, <sup>77,78</sup> | MGI:1857256, MGI:1857257     |
| <i>Il17af</i> <sup>-/-</sup> : B6-Il17a/Il17f <sup>tm1mpr</sup>                        | <sup>79</sup>                                                                                      | MGI:5438791                  |
| <i>Il23r</i> <sup>GFP/GFP</sup> mice                                                   | Burkhard Becher, University of Zurich, <sup>80</sup>                                               | MGI:3844602                  |
| B6.SJL-Ptprc <sup>a</sup> Pepc <sup>b</sup> /BoyJ                                      | Swiss Immunological Mouse Repository (SwImMR) hosted by the University of Zurich                   | N/A                          |
| Software and Algorithms                                                                |                                                                                                    |                              |
| GraphPad Prism V6                                                                      | GraphPad                                                                                           | www.graphpad.com             |
| NDP.view2.                                                                             | Hamamatsu                                                                                          | U12388-01, www.hamamatsu.com |
| FlowJo V10                                                                             | FlowJo LLC                                                                                         | www.flowjo.com               |
| Other                                                                                  |                                                                                                    |                              |
| Gallios Flow Cytometer                                                                 | Beckman Coulter                                                                                    | www.beckmancoulter.com       |
| SP6800 Spectral Analyzer                                                               | Sony                                                                                               | www.sony.com                 |
| NanoZoomer 2.0-HT                                                                      | Hamamatsu                                                                                          | www.hamamatsu.com            |
